# Supplementary material for: An All-Recombinant Protein-Based Culture System Specifically Identifies Hematopoietic Stem Cell Maintenance Factors
Source: PubMed Central journal article supplement — Stem Cell Reports. 2017 Feb 23;8(3):500–8. doi: 10.1016/j.stemcr.2017.01.015 (PMC5355634; doi:10.1016/j.stemcr.2017.01.015), 2017-02-23
Supplement: mmc1.pdf [file mmc1.pdf]

**Stem Cell Reports, Volume 8**

**Supplemental Information**

**An All-Recombinant Protein-Based Culture System Specifically Identifies Hematopoietic Stem Cell Maintenance Factors**

**Aki Ieyasu, Reiko Ishida, Takaharu Kimura, Maiko Morita, Adam C. Wilkinson, Kazuhiro Sudo, Toshinobu Nishimura, Jun Ohehara, Yoko Tajima, Chen-Yi Lai, Makoto Otsu, Yukio Nakamura, Hideo Ema, Hiromitsu Nakauchi, and Satoshi Yamazaki**

## Supplementary Experimental Procedures

### *Mice*

C57BL/6 (B6-Ly5.2) mice were purchased from SLC (Shizuoka, Japan) and B6-Ly5.1 from Sankyo Lab Service (Tsukuba, Japan). All animal care was in accordance with the guidelines of the University of Tokyo.

### *Purification of murine hematopoietic stem cells*

Mouse CD34<sup>-</sup>KSL HSCs were purified from BM cells of 8 to 10 week-old mice. Whole bone marrow cells were stained with an antibody cocktail consisting of biotinylated anti-Gr-1 (#13593185), -Mac-1 (#13011285), -CD4 (#13004285), -IL-7R (13127185), and -Ter-119 (#13592185) (eBioscience, San Diego, CA), and -B220 (#13045285) and -CD8 (#13008185) monoclonal antibodies (BioLegend, San Diego, CA) (lineage cocktail). Lineage-positive cells were depleted with anti-Biotin MicroBeads (MiltenyiBiotec, Auburn, CA) using LS columns (MiltenyiBiotec). The lineage-depleted fraction was then further stained with fluorescein isothiocyanate (FITC)-conjugated anti-CD34 (#11034185, BD Bioscience, California, CA), phycoerythrin (PE)-conjugated anti-Sca-1 (#108108, eBioscience), and allophycocyanin (APC)-conjugated anti-c-Kit antibodies (#17117183, BioLegend). Biotinylated antibodies were detected with streptavidin-APC-Cy7 (#47431782, BioLegend). Analysis and cell sorting were performed on a FACS Aria (BD Bioscience) and results were analyzed with FlowJo software (Tree Star, Ashland, OR).

### *Hematopoietic stem cell culture system*

CD34<sup>-</sup>KSL HSCs were deposited into 96-well micro-titer plates containing 200  $\mu$ l of serum free medium S-Clone SF-03 (Sanko JunyakuInc, Tokyo, Japan) supplemented with 1% BSA (Sigma, and Wako, Japan), MSA or HSA (Albumin Bioscience, Sigma, Bioverde) and cytokines (50 ng/ml mouse SCF, 50 ng/ml human TPO).

### *Competitive repopulation assays*

40 CD34<sup>+</sup>KSL cells from B6-Ly5.1 and the BM competitor cells ( $1 \times 10^6$ ) from B6-F1 mice were transplanted into B6-Ly5.2 mice irradiated at a dose of 9.8 Gy. Following transplantation, peripheral blood (PB) cells of the recipients were stained with PE-conjugated anti-Ly5.1 (BioLegend) and FITC-conjugated anti-Ly5.2 (BD Bioscience). The cells were further stained with PE-Cy7-conjugated anti-Mac-1 and -Gr-1, Pacific Blue (PB)-conjugated anti-B220 and APC-Cy7-conjugated anti-CD3 antibodies (BioLegend) and analyzed using a FACS Aria. Secondary BM transplantation assays were performed by transferring  $1 \times 10^6$  BM cells from the primary recipient mice into lethally irradiated B6-Ly5.2 mice. PB cells were collected from secondary recipient mice at 4, 8, 12 and 16 weeks post-transplantation and analyzed as above. For limiting dilution assays, 1000, 100, and 10 (seven-day) cultured cells were aliquoted by FACS and transplantation into lethally-irradiated mice together with  $2 \times 10^5$  BM competitor cells. PB cells were collected at 4 weeks post-transplantation and analyzed as above.

#### ***Purification samples for Mass Spectrometry analysis***

Depletion of albumin from BSA-FV was performed using Melon Gel IgG Spin Purification Kit (Thermo Scientific) according to the manufacturer's instructions. Briefly, 500  $\mu$ l of 10% BSA-FV in 10 mM HEPES pH7.3 was diluted 1:10 in Melon Gel Purification Buffer and applied to Melon Gel spin columns. After incubation for 5 min at room temperature with rotation, spin columns were centrifuged and flow through was used for mass spectrometry analysis (Medical & Biological Laboratories CO., LTD.).

#### ***Western blotting***

500  $\mu$ g of BSA-FV was subjected to albumin depletion. Total flow-through of Melon Gel was applied to SDS-PAGE, transferred to PVDF membranes and blots were incubated with rabbit polyclonal anti-hemopexin antibody (#ab133415, 1:1000, Abcam) for 30 min at room temperature. Following incubation with an appropriate secondary antibody, immunoreactivity was detected by chemiluminescence using Image Quant LAS4000 (GE Healthcare Life Science).

### ***ROS detection assay***

CD34<sup>+</sup>KSL cells were collected after 2 days of culture and stained with HySOx (excitation: 555 nm, emission: 575 nm; Goryo Chemical, Hokkaido, Japan), for 30 minutes at 37°C. After washing, cells were analyzed for ROS accumulation by FACS Aria. Cellular ROS were quantified by mean fluorescence intensity (MFI).

### ***Immunofluorescence staining of BM sections***

Frozen BM sections were prepared and immunostained according to the Kawamoto method (Kawamoto, 2003). BM sections were fixed using dry ice/ethanol or 4% paraformaldehyde (PFA). Immunofluorescence data were obtained and analyzed with a TCS SP2 AOBS confocal microscope (Leica, Microsystems, Tokyo). The immunofluorescence-microscopy images of BM sections were automatically obtained, using integrated reader software, from multiple replicates. Markers and antibodies used were: Alexa 488-conjugated goat anti-Rabbit IgG, and Alexa 647-conjugated goat anti-rabbit IgG (Molecular Probes, Carlsbad, CA, USA); rabbit anti-GFAP (#Z0334, Dako, Glostrup, Denmark); sheep anti-hemopexin (#MAB7007, R&D systems); 4, 6-diamidino-2-phenylindole (DAPI), a DNA marker.

### ***3D imaging***

3D imaging was performed as previously described (Susaki et al., 2015). In brief, after tibias were collected and fixed in 4% PFA solution, bone marrow plugs were extracted from bones by flushing. Upon DAPI staining, marrow plugs were treated with ScaleCUBIC-1 (Reagent-1) for one week followed by ScaleCUBIC-2 (Reagent-2) for another week. To visualize GFAP<sup>+</sup> cells and hemopexin<sup>+</sup>, cells were stained overnight with antibodies. Images were acquired using a ZEISS Z1 Lightsheet microscope (ZEISS) and 3D reconstitutions were performed with Imaris software (Bitplane).

### ***Statistical analysis***

Mean values of two groups were compared using two-tail unpaired t testing. All statistical analyses were performed on Prism 7 software (Graphpad, San Diego, CA).

## Supplemental Figure and Figure Legends

### Supplemental Figure 1

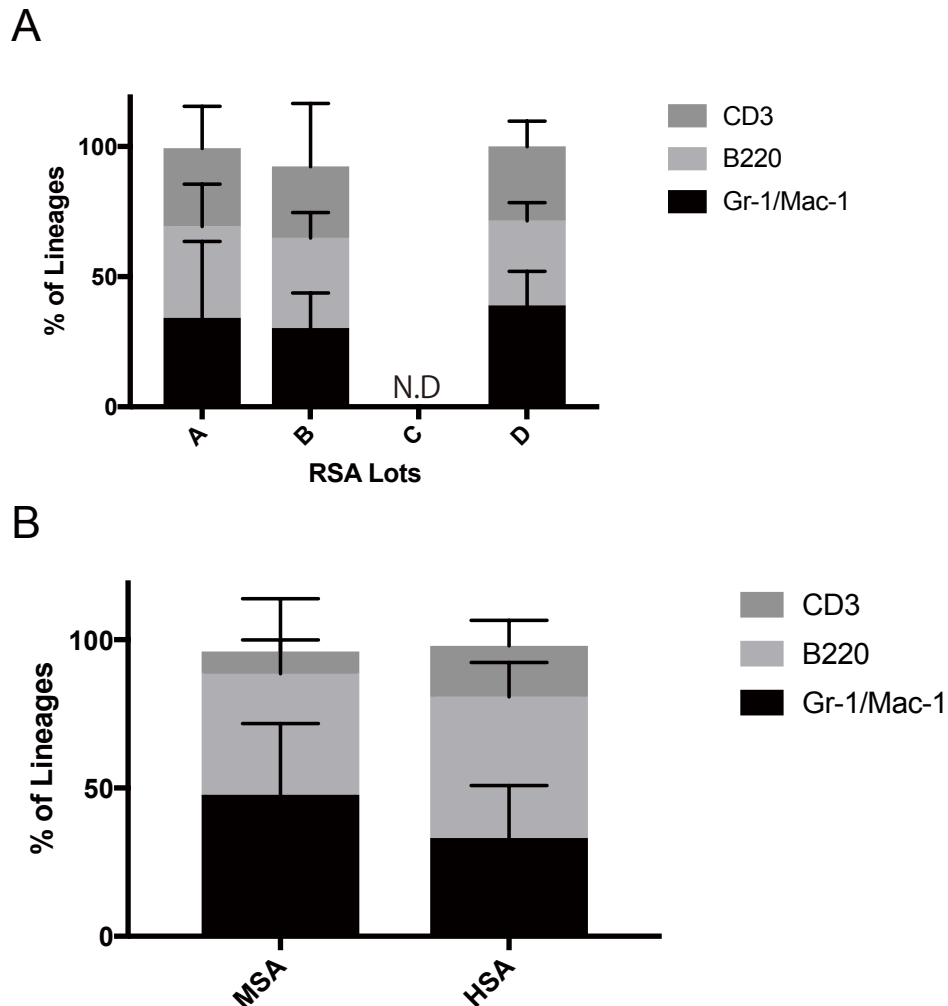

#### Supplementary Figure 1: Multi-lineage HSC output following RSA-based culture

(A) Ratio of myeloid (Gr-1/Mac-1<sup>+</sup>), B cell (B220<sup>+</sup>) and T cell (CD3<sup>+</sup>) PB chimerism from 40 CD34-HSCs cultured for seven days in various lots of RSA (A-D) supplemented with SCF and TPO. Mean ratios  $\pm$  SDs at 12 weeks post-transplantation, as described in Figure 3A (n = 5 per BSA-FV culture condition).

(B) Ratio of myeloid (Gr-1/Mac-1<sup>+</sup>), B cell (B220<sup>+</sup>) and T cell (CD3<sup>+</sup>) PB chimerism from 40 CD34-HSCs cultured for seven days in mouse RSA (MSA) or human RSA (HSA) supplemented with SCF and TPO. Mean ratios  $\pm$  SDs at 12 weeks post-transplantation, as described in Figure 3B (n = 5 per RSA culture condition).

## Supplemental Figure 2

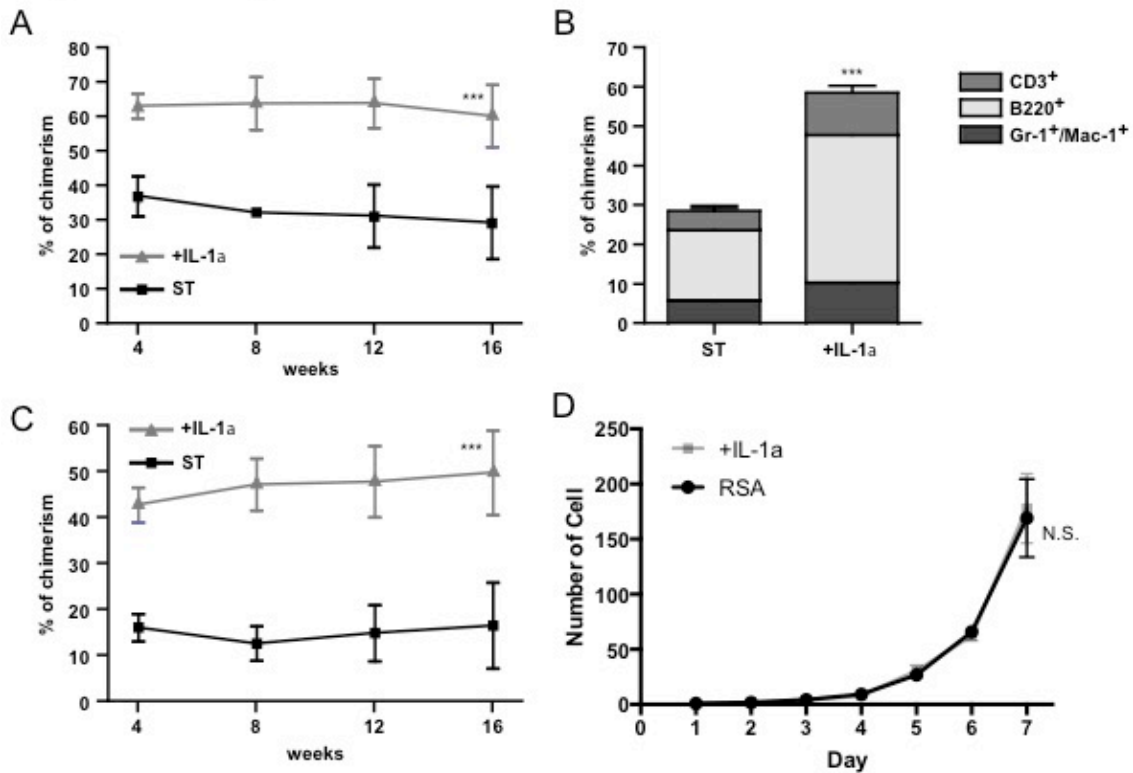

### Supplementary Figure 2: IL-1 $\alpha$ enhances *in vitro* HSC maintenance

(A,B) 40 CD34<sup>+</sup>KSL HSCs were cultured for one week with 1% HSA, SCF, TPO and 20 ng/ml IL-1 $\alpha$  before transplantation into lethally irradiated mice together with 10<sup>6</sup> BM competitor cells. (A) Time course analysis of PB chimerism. (B) The donor-derived PB cell ratio 12 weeks after transplantation. The data presented are the mean ratios  $\pm$  SDs of two independent experiments (n = 5 per culture condition).

(C) Secondary competitive repopulation analysis of BM from mice in (A). Data are the mean  $\pm$  SD of donor-derived PB cells (n = 10 per culture condition).

(D) Proliferation of HSCs with RSA with IL-1 $\alpha$  *in vitro*. Single CD34<sup>+</sup>KSL HSCs were cultured for one week in 96-well micro-titer plates in S-Clone SF-03 supplemented with SCF, TPO and 1% RSA (black line) with or without 20 ng/ml IL-1 $\alpha$ . Cell numbers were counted every 24 hours under a microscope. Data are the mean  $\pm$  SEM (n = 40 per culture condition).

Statistical significance denoted by \*\* ( $P < 0.05$ ), \*\*\* ( $P < 0.005$ ) or N.S. (not significant) as determined by unpaired t testing.

Supplemental Figure 3

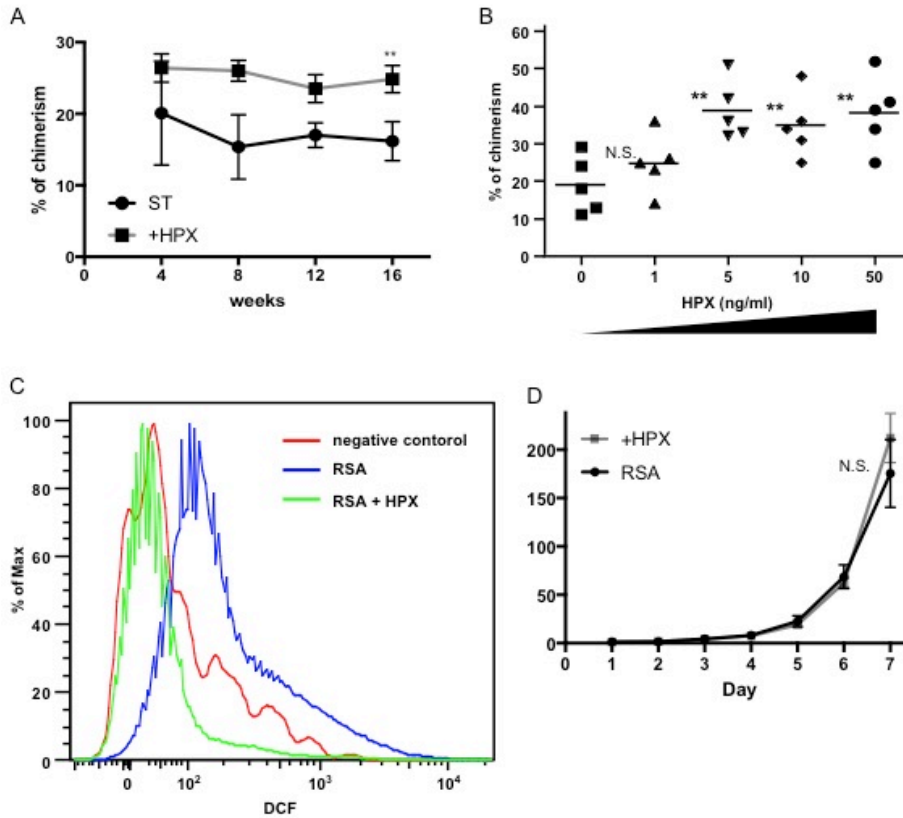

**Supplementary Figure 3: Hemopexin enhances engraftment of *in vitro* cultured HSCs**

(A) Secondary competitive repopulation analysis of BM from mice in Figure 4A. Data are the mean ± SD of donor-derived PB cells (n = 10 per culture condition).

(B) 40 CD34<sup>+</sup>KSL cells were cultured for 1 week with 1% MSA, SCF, TPO and various concentrations of HPX before transplantation into lethally irradiated recipient mice together with 10<sup>6</sup> BM competitor cells. The donor-derived chimerism was measured 12 weeks after transplantation. Data are the mean ± SD of donor-derived cells in the PB (n = 5 per culture condition) of two independent experiments.

(C) Representative flow cytometric plots displaying HySOx staining (a measure of ROS levels) of HSCs cultured *in vitro* with or without HPX.

(D) Proliferation of HSCs with RSA with HPX *in vitro*. Single CD34<sup>+</sup>KSL HSCs were cultured for one week in 96-well micro-titer plates in S-Clone SF-03 supplemented with SCF, TPO and 1% RSA (black line) with or without 10 ng/ml HPX. Cell numbers were counted every 24 hours under a microscope. Data are the mean ± SEM (n = 40 per culture condition).

Statistical significance denoted by \*\* ( $P < 0.05$ ), \*\*\* ( $P < 0.005$ ) or N.S. (not significant) as determined by unpaired t testing.

#### Supplemental Figure 4

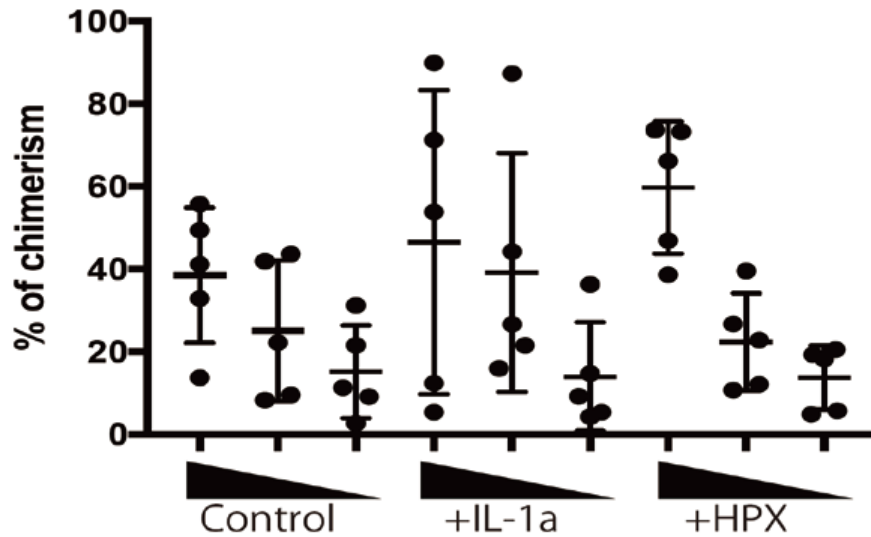

#### Supplementary Figure 4: Limiting dilution analysis of RSA-cultured HSCs

40 CD34<sup>+</sup>KSL HSCs were cultured for one week with 1% HSA, SCF, TPO with or without 20 ng/ml IL-1 $\alpha$  or 10 ng/ml HPX. 1000 (left bar), 100 (middle bar) and 10 (right bar) cultured cells were then aliquoted by FACS and transplantation into lethally irradiated mice together with  $2 \times 10^5$  BM competitor cells. PB chimerism at 4 weeks post-transplantation are displayed.



Supplemental Table 1

| BSA-FV #1        |                                                                                                                                             |                | BSA-FV #8        |                                                                                                       |                | BSA-FV #15       |                                                                                           |                |
|------------------|---------------------------------------------------------------------------------------------------------------------------------------------|----------------|------------------|-------------------------------------------------------------------------------------------------------|----------------|------------------|-------------------------------------------------------------------------------------------|----------------|
| Accession number | Name                                                                                                                                        | Peptides (95%) | Accession number | Name                                                                                                  | Peptides (95%) | Accession number | Name                                                                                      | Peptides (95%) |
| gi 30794280      | serum albumin precursor [Bos taurus]                                                                                                        | 1129           | gi 30794280      | serum albumin precursor [Bos taurus]                                                                  | 823            | gi 30794280      | serum albumin precursor [Bos taurus]                                                      | 686            |
| gi 154425704     | ALB protein [Bos taurus]                                                                                                                    | 971            | gi 154425704     | ALB protein [Bos taurus]                                                                              | 700            | gi 74267962      | ALB protein [Bos taurus]                                                                  | 575            |
| gi 296490958     | TPA: serotransferrin precursor [Bos taurus]                                                                                                 | 654            | gi 27806789      | transferrin precursor [Bos taurus]                                                                    | 216            | gi 99028969      | complement C3 preproprotein [Bos taurus]                                                  | 130            |
| gi 2501351       | RecName: Full=Serotransferrin; Short=Transferrin; AltName: Full=Beta-1 metal-binding globulin; AltName: Full=Siderophilin; Flags: Precursor | 636            | gi 1699167       | IgG2a heavy chain constant region [Bos taurus]                                                        | 63             | gi 27806789      | transferrin precursor [Bos taurus]                                                        | 92             |
| gi 77736171      | hemopexin precursor [Bos taurus]                                                                                                            | 186            | gi 99028969      | complement C3 preproprotein [Bos taurus]                                                              | 55             | gi 109939993     | Apolipoprotein H (beta-2-glycoprotein I) [Bos taurus]                                     | 88             |
| gi 114051225     | protein HP-20 homolog precursor [Bos taurus]                                                                                                | 96             | gi 94966811      | alpha-1-acid glycoprotein precursor [Bos taurus]                                                      | 42             | gi 74353860      | IGL@ protein [Bos taurus]                                                                 | 53             |
| gi 114050753     | protein HP-25 homolog 1 precursor [Bos taurus]                                                                                              | 55             | gi 296490958     | TPA: serotransferrin precursor [Bos taurus]                                                           | 41             | gi 151556360     | Unknown (protein for MGC:159378) [Bos taurus]                                             | 51             |
| gi 27806789      | transferrin precursor [Bos taurus]                                                                                                          | 53             | gi 74353860      | IGL@ protein [Bos taurus]                                                                             | 40             | gi 15088675      | immunoglobulin lambda light chain [Bos taurus]                                            | 51             |
| gi 114052108     | protein HP-25 homolog 2 precursor [Bos taurus]                                                                                              | 39             | gi 296486756     | TPA: complement factor I [Bos taurus]                                                                 | 37             | gi 77735883      | serum amyloid P-component precursor [Bos taurus]                                          | 49             |
| gi 6             | beta-2-glycoprotein I [Bos taurus]                                                                                                          | 37             | gi 77735367      | ribonuclease UK114 [Bos taurus]                                                                       | 36             | gi 297461373     | PREDICTED: complement factor H-related protein 2 [Bos taurus]                             | 42             |
| gi 92096965      | Immunoglobulin light chain, lambda gene cluster [Bos taurus]                                                                                | 34             | gi 108750        | Ig heavy chain precursor (B/MT.4A.17.H5.A5) - bovine                                                  | 28             | gi 296490958     | TPA: serotransferrin precursor [Bos taurus]                                               | 38             |
| gi 116812902     | hemoglobin subunit alpha [Bos taurus]                                                                                                       | 32             | gi 296478893     | TPA: proteoglycan 4 [Bos taurus]                                                                      | 24             | gi 75812954      | fibrinogen alpha chain precursor [Bos taurus]                                             | 16             |
| gi 27819608      | hemoglobin subunit beta [Bos taurus]                                                                                                        | 31             | gi 296487872     | TPA: keratin 6A [Bos taurus]                                                                          | 19             | gi 343197018     | immunoglobulin lambda light chain constant region 3 allotypic variant IGLC3b [Bos taurus] | 16             |
| gi 77735935      | complement C2 precursor [Bos taurus]                                                                                                        | 30             | gi 343197018     | immunoglobulin lambda light chain constant region 3 allotypic variant IGLC3b [Bos taurus]             | 18             | gi 77404252      | collagen alpha-1(I) chain precursor [Bos taurus]                                          | 15             |
| gi 91982959      | immunoglobulin gamma 1 heavy chain constant region [Bos taurus]                                                                             | 27             | gi 27807007      | insulin-like growth factor-binding protein 3 precursor [Bos taurus]                                   | 16             | gi 164414427     | collagen alpha-1(II) chain isoform 2 precursor [Bos taurus]                               | 14             |
| gi 59858077      | aspartate aminotransferase 1 [Bos taurus]                                                                                                   | 26             | gi 297461373     | PREDICTED: complement factor H-related protein 2 [Bos taurus]                                         | 15             | gi 28189426      | similar to ubiquitin-S27a fusion protein [Bos taurus]                                     | 12             |
| gi 108750        | Ig heavy chain precursor (B/MT.4A.17.H5.A5) - bovine                                                                                        | 23             | gi 296484341     | TPA: protein AMBP precursor [Bos taurus]                                                              | 14             | gi 330688394     | folate receptor alpha precursor [Bos taurus]                                              | 11             |
| gi 270483766     | beta-hexosaminidase subunit beta preproprotein [Bos taurus]                                                                                 | 22             | gi 153791660     | extracellular matrix protein 1 precursor [Bos taurus]                                                 | 12             | gi 2323380       | immunoglobulin light chain variable region [Bos taurus]                                   | 11             |
| gi 95147674      | complement factor B precursor [Bos taurus]                                                                                                  | 21             | gi 95147674      | complement factor B precursor [Bos taurus]                                                            | 12             | gi 27807007      | insulin-like growth factor-binding protein 3 precursor [Bos taurus]                       | 10             |
| gi 296475479     | TPA: fumarylacetoacetase [Bos taurus]                                                                                                       | 17             | gi 310893435     | immunoglobulin light chain [Bos taurus]                                                               | 12             | gi 2323402       | immunoglobulin light chain variable region [Bos taurus]                                   | 10             |
| gi 1699167       | IgG2a heavy chain constant region [Bos taurus]                                                                                              | 16             | gi 75812954      | fibrinogen alpha chain precursor [Bos taurus]                                                         | 11             | gi 95147674      | complement factor B precursor [Bos taurus]                                                | 10             |
| gi 343197026     | immunoglobulin lambda light chain constant region 3 allotypic variant IGLC3c [Bos taurus]                                                   | 15             | gi 296476317     | TPA: keratin, type I cytoskeletal 14 [Bos taurus]                                                     | 10             | gi 153791660     | extracellular matrix protein 1 precursor [Bos taurus]                                     | 9              |
| gi 358422418     | PREDICTED: WASH complex subunit 7-like [Bos taurus]                                                                                         | 13             | gi 77736171      | hemopexin precursor [Bos taurus]                                                                      | 10             | gi 358420619     | PREDICTED: complement C4-A [Bos taurus]                                                   | 9              |
| gi 156120479     | fructose-bisphosphate aldolase A [Bos taurus]                                                                                               | 12             | gi 358421409     | PREDICTED: keratin, type II cytoskeletal 1 [Bos taurus]                                               | 9              | gi 84000165      | complement factor I precursor [Bos taurus]                                                | 8              |
| gi 27807261      | acidic mammalian chitinase precursor [Bos taurus]                                                                                           | 11             | gi 114051856     | keratin, type II cytoskeletal 7 [Bos taurus]                                                          | 9              | gi 75832056      | apolipoprotein A-I preproprotein [Bos taurus]                                             | 7              |
| gi 114051379     | leucine-rich alpha-2-glycoprotein precursor [Bos taurus]                                                                                    | 10             | gi 358422499     | PREDICTED: keratin, type I cytoskeletal 10-like [Bos taurus]                                          | 9              | gi 296485168     | TPA: serine peptidase inhibitor, Kazal type 5 [Bos taurus]                                | 7              |
| gi 2323386       | immunoglobulin light chain variable region [Bos taurus]                                                                                     | 10             | gi 160395544     | RecName: Full=Keratin, type I cytoskeletal 17; AltName: Full=Cytokeratin-17; Short=CK-17; Short=K17   | 9              | gi 164450479     | kininogen-2 isoform 1 precursor [Bos taurus]                                              | 7              |
| gi 30038325      | cathepsin C [Bos taurus]                                                                                                                    | 9              | gi 156120885     | CD5 antigen-like precursor [Bos taurus]                                                               | 8              | gi 115497340     | serum amyloid A protein precursor [Bos taurus]                                            | 6              |
| gi 77735921      | fructose-bisphosphate aldolase B [Bos taurus]                                                                                               | 6              | gi 358417209     | PREDICTED: extracellular peptidase inhibitor-like [Bos taurus]                                        | 8              | gi 255003702     | fibronectin precursor [Bos taurus]                                                        | 5              |
| gi 296475228     | TPA: serpin peptidase inhibitor, clade A (alpha-1 antiproteinase, antitrypsin), member 3 [Bos taurus]                                       | 6              | gi 2323386       | immunoglobulin light chain variable region [Bos taurus]                                               | 8              | gi 8100793       | insulin-like growth factor I [Bos taurus]                                                 | 4              |
| gi 154425814     | IGK protein [Bos taurus]                                                                                                                    | 5              | gi 77735883      | serum amyloid P-component precursor [Bos taurus]                                                      | 7              | gi 296484341     | TPA: protein AMBP precursor [Bos taurus]                                                  | 4              |
| gi 397740864     | vitamin D binding protein [Bos taurus]                                                                                                      | 5              | gi 358420619     | PREDICTED: complement C4-A [Bos taurus]                                                               | 6              | gi 59858077      | aspartate aminotransferase 1 [Bos taurus]                                                 | 4              |
| gi 114052298     | apolipoprotein A-II precursor [Bos taurus]                                                                                                  | 5              | gi 296475228     | TPA: serpin peptidase inhibitor, clade A (alpha-1 antiproteinase, antitrypsin), member 3 [Bos taurus] | 5              | gi 94966811      | alpha-1-acid glycoprotein precursor [Bos taurus]                                          | 4              |
| gi 358421409     | PREDICTED: keratin, type II cytoskeletal 1 [Bos taurus]                                                                                     | 4              | gi 27806741      | beta-2-glycoprotein 1 precursor [Bos taurus]                                                          | 5              | gi 296487872     | TPA: keratin 6A [Bos taurus]                                                              | 4              |
| gi 194685481     | PREDICTED: keratin, type I cytoskeletal 10-like isoform 2 [Bos taurus]                                                                      | 4              | gi 59858077      | aspartate aminotransferase 1 [Bos taurus]                                                             | 4              | gi 29648975      | TPA: CD5 molecule-like [Bos taurus]                                                       | 4              |
| gi 30466252      | carbonic anhydrase 2 [Bos taurus]                                                                                                           | 4              | gi 27807341      | cathelicidin-1 precursor [Bos taurus]                                                                 | 2              | gi 395268        | conglutinin [Bos taurus]                                                                  | 3              |
| gi 78369426      | prostaglandin reductase 1 [Bos taurus]                                                                                                      | 4              | gi 296480310     | TPA: apolipoprotein A-I-like [Bos taurus]                                                             | 2              | gi 397740864     | vitamin D binding protein [Bos taurus]                                                    | 3              |
| gi 41386683      | beta-2-microglobulin precursor [Bos taurus]                                                                                                 | 4              | gi 375065868     | ceruloplasmin precursor [Bos taurus]                                                                  | 2              | gi 114051856     | keratin, type II cytoskeletal 7 [Bos taurus]                                              | 3              |
| gi 83405800      | Legumain [Bos taurus]                                                                                                                       | 4              | gi 78369352      | complement component C9 precursor [Bos taurus]                                                        | 2              | gi 78369352      | complement component C9 precursor [Bos taurus]                                            | 3              |
| gi 302179501     | epidermal growth factor receptor [Bos taurus]                                                                                               | 4              | gi 300797776     | DNA-directed RNA polymerase I subunit RPA1 [Bos taurus]                                               | 1              | gi 27807009      | insulin-like growth factor-binding protein 4 precursor [Bos taurus]                       | 2              |

|              |                                                                                                                                                                        |      |              |                                                                                                                                             |     |              |                                                                                                                                                                        |     |
|--------------|------------------------------------------------------------------------------------------------------------------------------------------------------------------------|------|--------------|---------------------------------------------------------------------------------------------------------------------------------------------|-----|--------------|------------------------------------------------------------------------------------------------------------------------------------------------------------------------|-----|
| gi 129277510 | extracellular superoxide dismutase [Cu-Zn] precursor [Bos taurus]                                                                                                      | 3    | gi 91982959  | immunoglobulin gamma 1 heavy chain constant region [Bos taurus]                                                                             | 25  | gi 126607    | RecName: Full=Lysozyme C; AltName: Full=1,4-beta-N-acetylmuramidase C; Flags: Precursor                                                                                | 2   |
| gi 114052314 | plasma kallikrein precursor [Bos taurus]                                                                                                                               | 3    | gi 148356276 | keratin, type II cytoskeletal 4 [Bos taurus]                                                                                                | 6   | gi 47564119  | apolipoprotein C-III precursor [Bos taurus]                                                                                                                            | 1   |
| gi 333360891 | hepatocyte growth factor activator preproprotein [Bos taurus]                                                                                                          | 3    | gi 22773998  | immunoglobulin delta heavy chain membrane bound form [Bos taurus]                                                                           | 4   | gi 343197026 | immunoglobulin lambda light chain constant region 3 allotypic variant IGLC3c [Bos taurus]                                                                              | 15  |
| gi 84000195  | phosphoglycerate mutase 2 [Bos taurus]                                                                                                                                 | 3    | gi 75832116  | inter-alpha-trypsin inhibitor heavy chain H4 precursor [Bos taurus]                                                                         | 2   | gi 310893435 | immunoglobulin light chain [Bos taurus]                                                                                                                                | 8   |
| gi 94966763  | haptoglobin precursor [Bos taurus]                                                                                                                                     | 3    | gi 397740864 | vitamin D binding protein [Bos taurus]                                                                                                      | 2   | gi 2323384   | immunoglobulin light chain variable region [Bos taurus]                                                                                                                | 7   |
| gi 75812940  | phosphatidylethanolamine-binding protein 1 [Bos taurus]                                                                                                                | 2    | gi 291490675 | CD44 antigen precursor [Bos taurus]                                                                                                         | 2   | gi 358421409 | PREDICTED: keratin, type II cytoskeletal 1 [Bos taurus]                                                                                                                | 3   |
| gi 61888856  | triosephosphate isomerase [Bos taurus]                                                                                                                                 | 2    | gi 300795742 | synaptic vesicle membrane protein VAT-1 homolog [Bos taurus]                                                                                | 2   | gi 77735935  | complement C2 precursor [Bos taurus]                                                                                                                                   | 3   |
| gi 375065868 | ceruloplasmin precursor [Bos taurus]                                                                                                                                   | 2    | gi 432134242 | DNA excision repair protein ERCC-6-like 2 [Bos taurus]                                                                                      | 1   | gi 45429979  | spleen trypsin inhibitor 1 precursor [Bos taurus]                                                                                                                      | 3   |
| gi 358421417 | PREDICTED: keratin, type II cytoskeletal 3 [Bos taurus]                                                                                                                | 2    | gi 329664128 | protocadherin-17 precursor [Bos taurus]                                                                                                     | 1   | gi 41386685  | thrombospondin-1 precursor [Bos taurus]                                                                                                                                | 2   |
| gi 156120583 | arylsulfatase G [Bos taurus]                                                                                                                                           | 2    | gi 164448719 | sterile alpha motif domain-containing protein 3 [Bos taurus]                                                                                | 1   | gi 296487901 | TPA: insulin-like growth factor-binding protein 6 precursor [Bos taurus]                                                                                               | 2   |
| gi 27806591  | glutathione peroxidase 1 [Bos taurus]                                                                                                                                  | 2    | gi 156120521 | kinesin-like protein KIFC1 [Bos taurus]                                                                                                     | 1   | gi 27806907  | clusterin preproprotein [Bos taurus]                                                                                                                                   | 2   |
| gi 34538498  | immunoglobulin heavy chain constant region [Bos taurus]                                                                                                                | 2    | gi 27806751  | alpha-2-HS-glycoprotein precursor [Bos taurus]                                                                                              | 1   | gi 194670528 | PREDICTED: ribonuclease 4 [Bos taurus]                                                                                                                                 | 2   |
| gi 15088675  | immunoglobulin lambda light chain [Bos taurus]                                                                                                                         | 29   | gi 114051379 | leucine-rich alpha-2-glycoprotein precursor [Bos taurus]                                                                                    | 1   | gi 27806751  | alpha-2-HS-glycoprotein precursor [Bos taurus]                                                                                                                         | 2   |
| gi 148744128 | Unknown (protein for MGC:159455) [Bos taurus]                                                                                                                          | 29   | gi 359070805 | PREDICTED: collagen alpha-1(V) chain-like [Bos taurus]                                                                                      | 1   | gi 157954059 | Fe fragment of IgG, low affinity IIc, receptor for (CD32) [Bos taurus]                                                                                                 | 2   |
| gi 343197018 | immunoglobulin lambda light chain constant region 3 allotypic variant IGLC3b [Bos taurus]                                                                              | 9    | gi 1351907   | RecName: Full=Serum albumin; AltName: Full=BSA; AltName: Allergen=Bos d 6; Flags: Precursor                                                 | 821 | gi 6006423   | hemoglobin alpha chain [Bos taurus]                                                                                                                                    | 2   |
| gi 310893435 | immunoglobulin light chain [Bos taurus]                                                                                                                                | 7    | gi 74267962  | ALB protein [Bos taurus]                                                                                                                    | 702 | gi 297488636 | PREDICTED: protein phosphatase 1M [Bos taurus]                                                                                                                         | 1   |
| gi 296487283 | TPA: hyaluronan synthase 2-like [Bos taurus]                                                                                                                           | 3    | gi 83764016  | prepro complement component C3 [Bos taurus]                                                                                                 | 55  | gi 27807335  | cathelicidin-7 precursor [Bos taurus]                                                                                                                                  | 1   |
| gi 187171271 | dual specificity mitogen-activated protein kinase kinase 2 [Bos taurus]                                                                                                | 2    | gi 4093220   | complement component 3 [Bos taurus]                                                                                                         | 55  | gi 114050753 | protein HP-25 homolog 1 precursor [Bos taurus]                                                                                                                         | 1   |
| gi 83764016  | prepro complement component C3 [Bos taurus]                                                                                                                            | 1    | gi 122697593 | alpha-1-acid glycoprotein precursor [Bos taurus]                                                                                            | 42  | gi 85681876  | RecName: Full=Protein-lysine 6-oxidase; AltName: Full=Lysyl oxidase; Flags: Precursor                                                                                  | 1   |
| gi 148745450 | Fibrinogen alpha chain [Bos taurus]                                                                                                                                    | 1    | gi 114326282 | serotransferrin precursor [Bos taurus]                                                                                                      | 40  | gi 296487283 | TPA: hyaluronan synthase 2-like [Bos taurus]                                                                                                                           | 1   |
| gi 300797661 | transcription elongation factor SPT6 [Bos taurus]                                                                                                                      | 1    | gi 2501351   | RecName: Full=Serotransferrin; Short=Transferrin; AltName: Full=Beta-1 metal-binding globulin; AltName: Full=Siderophilin; Flags: Precursor | 40  | gi 114051379 | leucine-rich alpha-2-glycoprotein precursor [Bos taurus]                                                                                                               | 1   |
| gi 164452943 | gelsolin isoform a precursor [Bos taurus]                                                                                                                              | 1    | gi 84000165  | complement factor 1 precursor [Bos taurus]                                                                                                  | 37  | gi 1351907   | RecName: Full=Serum albumin; AltName: Full=BSA; AltName: Allergen=Bos d 6; Flags: Precursor                                                                            | 685 |
| gi 300795058 | gamma-glutamyltransferase 5 precursor [Bos taurus]                                                                                                                     | 1    | gi 151556360 | Unknown (protein for MGC:159378) [Bos taurus]                                                                                               | 37  | gi 154425704 | ALB protein [Bos taurus]                                                                                                                                               | 573 |
| gi 151554455 | MSH3 protein [Bos taurus]                                                                                                                                              | 1    | gi 343197030 | immunoglobulin lambda light chain constant region 3 allotypic variant IGLC3d [Bos taurus]                                                   | 26  | gi 83764016  | prepro complement component C3 [Bos taurus]                                                                                                                            | 130 |
| gi 157954059 | Fe fragment of IgG, low affinity IIc, receptor for (CD32) [Bos taurus]                                                                                                 | 1    | gi 331284120 | proteoglycan 4 precursor [Bos taurus]                                                                                                       | 20  | gi 2506196   | RecName: Full=Beta-2-glycoprotein 1; AltName: Full=Apolipoprotein H; Short=Apo-H; AltName: Full=Beta-2-glycoprotein I; Short=B2GPI; Short=Beta(2)GPI; Flags: Precursor | 88  |
| gi 77735466  | complement factor D precursor [Bos taurus]                                                                                                                             | 1    | gi 343197008 | immunoglobulin lambda light chain constant region 2 allotypic variant IGLC2c [Bos taurus]                                                   | 20  | gi 6         | beta-2-glycoprotein I [Bos taurus]                                                                                                                                     | 88  |
| gi 1351907   | RecName: Full=Serum albumin; AltName: Full=BSA; AltName: Allergen=Bos d 6; Flags: Precursor                                                                            | 1125 | gi 134085706 | keratin, type II cytoskeletal 6A [Bos taurus]                                                                                               | 19  | gi 92096965  | Immunoglobulin light chain, lambda gene cluster [Bos taurus]                                                                                                           | 48  |
| gi 74267962  | ALB protein [Bos taurus]                                                                                                                                               | 978  | gi 343197026 | immunoglobulin lambda light chain constant region 3 allotypic variant IGLC3c [Bos taurus]                                                   | 16  | gi 139948632 | immunoglobulin lambda-like polypeptide 1 precursor [Bos taurus]                                                                                                        | 45  |
| gi 114326282 | serotransferrin precursor [Bos taurus]                                                                                                                                 | 643  | gi 163190    | insulin-like growth factor binding protein-3 [Bos taurus]                                                                                   | 14  | gi 2501351   | RecName: Full=Serotransferrin; Short=Transferrin; AltName: Full=Beta-1 metal-binding globulin; AltName: Full=Siderophilin; Flags: Precursor                            | 37  |
| gi 2506196   | RecName: Full=Beta-2-glycoprotein 1; AltName: Full=Apolipoprotein H; Short=Apo-H; AltName: Full=Beta-2-glycoprotein I; Short=B2GPI; Short=Beta(2)GPI; Flags: Precursor | 37   | gi 27806743  | protein AMBP precursor [Bos taurus]                                                                                                         | 14  | gi 114326282 | serotransferrin precursor [Bos taurus]                                                                                                                                 | 37  |
| gi 109939993 | Apolipoprotein H (beta-2-glycoprotein 1) [Bos taurus]                                                                                                                  | 37   | gi 2323404   | immunoglobulin light chain variable region [Bos taurus]                                                                                     | 12  | gi 148745450 | Fibrinogen alpha chain [Bos taurus]                                                                                                                                    | 16  |
| gi 74353860  | IGL@ protein [Bos taurus]                                                                                                                                              | 33   | gi 1276627   | immunoglobulin lambda light chain variable region, partial [Bos taurus]                                                                     | 12  | gi 164414425 | collagen alpha-1(II) chain isoform 1 precursor [Bos taurus]                                                                                                            | 14  |
| gi 139948632 | immunoglobulin lambda-like polypeptide 1 precursor [Bos taurus]                                                                                                        | 32   | gi 148745450 | Fibrinogen alpha chain [Bos taurus]                                                                                                         | 11  | gi 3789962   | fibrinogen A-alpha chain [Bos taurus]                                                                                                                                  | 14  |
| gi 296474257 | TPA: complement component 2 precursor [Bos taurus]                                                                                                                     | 30   | gi 3789962   | fibrinogen A-alpha chain [Bos taurus]                                                                                                       | 11  | gi 329665078 | polyubiquitin-C [Bos taurus]                                                                                                                                           | 14  |
| gi 11120280  | complement component 2 precursor [Bos taurus]                                                                                                                          | 30   | gi 262118301 | keratin, type I cytoskeletal 14 [Bos taurus]                                                                                                | 10  | gi 350537449 | putative ubiquitin C variant 5 [Taeniopygia guttata]                                                                                                                   | 13  |
| gi 6006425   | hemoglobin alpha chain [Bos taurus]                                                                                                                                    | 30   | gi 116004057 | keratin, type II cytoskeletal 75 [Bos taurus]                                                                                               | 10  | gi 296478548 | TPA: ubiquitin C [Bos taurus]                                                                                                                                          | 13  |

|              |                                                                                                                                          |    |              |                                                                                           |   |              |                                                                                                                                                                                                      |    |
|--------------|------------------------------------------------------------------------------------------------------------------------------------------|----|--------------|-------------------------------------------------------------------------------------------|---|--------------|------------------------------------------------------------------------------------------------------------------------------------------------------------------------------------------------------|----|
| gi 12206517  | RecName: Full=Aspartate aminotransferase, cytoplasmic; AltName: Full=Glutamate oxaloacetate transaminase 1; AltName: Full=Transaminase A | 26 | gi 297474460 | PREDICTED: keratin, type II cytoskeletal 1 [Bos taurus]                                   | 9 | gi 28189917  | similar to polyubiquitin [Bos taurus]                                                                                                                                                                | 13 |
| gi 15470790  | fumarylacetoacetase [Bos taurus]                                                                                                         | 17 | gi 296476308 | TPA: keratin, type I cytoskeletal 10 [Bos taurus]                                         | 9 | gi 28189839  | similar to polyubiquitin [Bos taurus]                                                                                                                                                                | 13 |
| gi 154425761 | FAH protein [Bos taurus]                                                                                                                 | 17 | gi 27805977  | keratin, type I cytoskeletal 10 [Bos taurus]                                              | 9 | gi 27806505  | polyubiquitin-B [Bos taurus]                                                                                                                                                                         | 13 |
| gi 7547266   | IgG1 heavy chain constant region [Bos taurus]                                                                                            | 16 | gi 194685481 | PREDICTED: keratin, type I cytoskeletal 10-like isoform 2 [Bos taurus]                    | 9 | gi 163575    | polyubiquitin, partial [Bos taurus]                                                                                                                                                                  | 13 |
| gi 119892690 | PREDICTED: WASH complex subunit 7 [Bos taurus]                                                                                           | 13 | gi 358416465 | PREDICTED: immunoglobulin lambda-like polypeptide 5-like [Bos taurus]                     | 9 | gi 163573    | polyubiquitin, partial [Bos taurus]                                                                                                                                                                  | 13 |
| gi 343197004 | immunoglobulin lambda light chain constant region 2 allotypic variant IGLC2b [Bos taurus]                                                | 13 | gi 343196996 | immunoglobulin lambda light chain constant region 2 allotypic variant IGLC2a [Bos taurus] | 9 | gi 110282963 | RecName: Full=Folate receptor alpha; Short=FR-alpha; AltName: Full=Folate receptor 1; AltName: Full=Folate-binding protein 1; Short=FBP; AltName: Full=Milk folate-binding protein; Flags: Precursor | 11 |
| gi 343197008 | immunoglobulin lambda light chain constant region 2 allotypic variant IGLC2c [Bos taurus]                                                | 11 | gi 157427776 | keratin, type I cytoskeletal 17 [Bos taurus]                                              | 9 | gi 2323374   | immunoglobulin light chain variable region [Bos taurus]                                                                                                                                              | 11 |
| gi 2323380   | immunoglobulin light chain variable region [Bos taurus]                                                                                  | 10 | gi 296489775 | TPA: CDS molecule-like [Bos taurus]                                                       | 8 | gi 2323376   | immunoglobulin light chain variable region [Bos taurus]                                                                                                                                              | 11 |
| gi 2323376   | immunoglobulin light chain variable region [Bos taurus]                                                                                  | 10 | gi 2323380   | immunoglobulin light chain variable region [Bos taurus]                                   | 8 | gi 2323386   | immunoglobulin light chain variable region [Bos taurus]                                                                                                                                              | 11 |
| gi 2323374   | immunoglobulin light chain variable region [Bos taurus]                                                                                  | 10 | gi 2323376   | immunoglobulin light chain variable region [Bos taurus]                                   | 8 | gi 296478557 | TPA: ubiquitin B-like [Bos taurus]                                                                                                                                                                   | 10 |
| gi 75812938  | dipeptidyl peptidase 1 precursor [Bos taurus]                                                                                            | 9  | gi 358421417 | PREDICTED: keratin, type II cytoskeletal 3 [Bos taurus]                                   | 8 | gi 163190    | insulin-like growth factor binding protein-3 [Bos taurus]                                                                                                                                            | 10 |
| gi 359064628 | PREDICTED: protein piccolo-like [Bos taurus]                                                                                             | 9  |              |                                                                                           |   | gi 296479849 | TPA: folate receptor 1-like [Bos taurus]                                                                                                                                                             | 10 |
|              |                                                                                                                                          |    |              |                                                                                           |   | gi 2323400   | immunoglobulin light chain variable region [Bos taurus]                                                                                                                                              | 10 |
|              |                                                                                                                                          |    |              |                                                                                           |   | gi 296486756 | TPA: complement factor I [Bos taurus]                                                                                                                                                                | 8  |
|              |                                                                                                                                          |    |              |                                                                                           |   | gi 975844    | immunoglobulin lambda light chain variable region, partial [Bos taurus]                                                                                                                              | 8  |
